# Supplementary material for: CDT1-Mediated Regulation of DNA Damage Repair and Immune-Related Target Genes Underlies Hepatocellular Carcinoma Development
Source: Research Square preprint supplement (doi:10.21203/rs.3.rs-8024873/v1), 2025-12-02
Supplement: Supplementary file 1 [file ccf446d26e85f3a28a776e3b.xlsx]

## Sheet: Sheet1
Table S1. Primers sets, related to the experimental procedures.
RT-qPCR primers for gene expression qualification.
Gene	Primer	Sequence (5'-3')
GAPDH	Forward	GGTCGGAGTCAACGGATTTG
	Reverse	GGAAGATGGTGATGGGATTTC
CDT1	Forward	TTAGAACGGCTGCCTGAG
	Reverse	GGTGCTTCTCCATTTCCC
