# Supplementary material for: CDT1-Mediated Regulation of DNA Damage Repair and Immune-Related Target Genes Underlies Hepatocellular Carcinoma Development
Source: Research Square preprint supplement (doi:10.21203/rs.3.rs-8024873/v1), 2025-12-02

Supplementary Fig. S1A. Full-length blot images for Fig. 1B

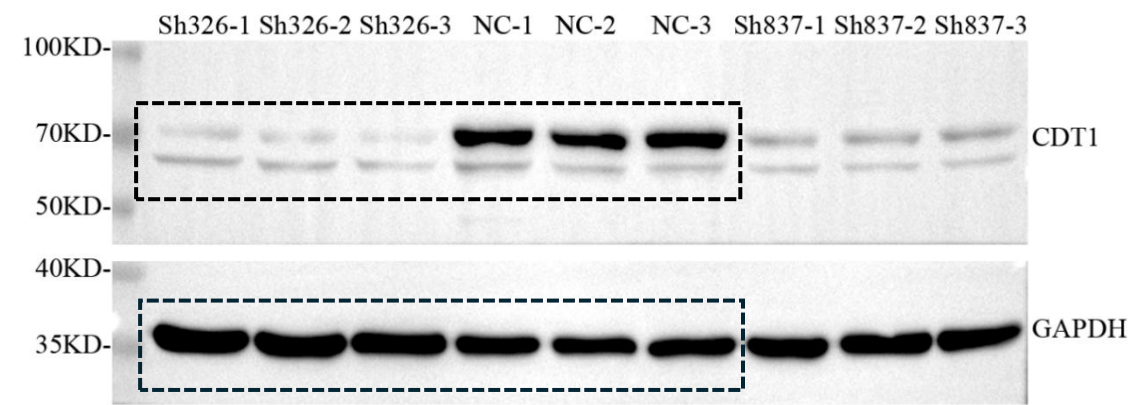

Supplementary Fig. S1B. Full-length blot images for Fig. 5A

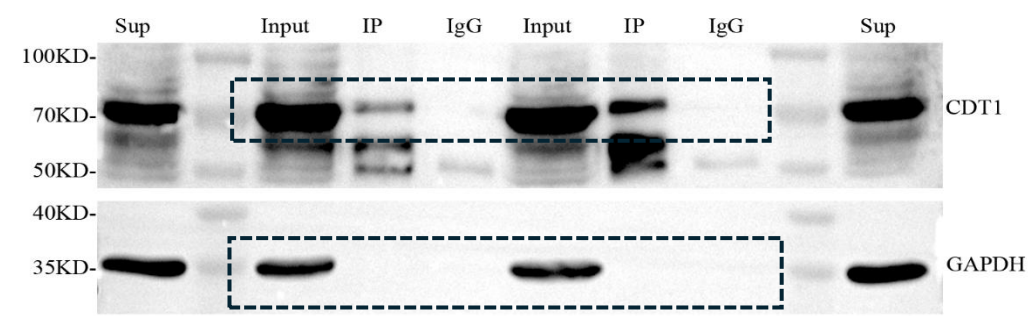

Supplement: Supplementary file 1 [file e2866142f632461293e686e9.pdf]
